# Supplementary material
Source: PubMed Central journal article supplement (PMC2682910)
Supplement: M809656200_1.pdf [file M809656200_1.pdf]

## Supplementary figure legends

**Suppl. Fig. S1.  $^1\text{H}$ - $^{15}\text{N}$  HSQC spectra of wild type RelE in the RelB<sub>C</sub>-free and bound states.** The wild type RelE was co-expressed with antitoxin RelB and purified under denaturing conditions. The spectra of a refolded  $^{15}\text{N}$ -labeled wild type RelE in free (blue) and RelB<sub>C</sub>-bound (red) states were recorded under the same conditions as that of the RelE<sup>R81A/R83A</sup> mutant (Fig. 2). Due to the spectral similarity, assignments of some wild type peaks can be transferred from the RelE<sup>R81A/R83A</sup> spectrum.

**Suppl. Fig. S2. RelB<sub>C</sub> binding affinities of wild type RelE and RelE<sup>R81A/R83A</sup> mutant.** Intrinsic tryptophan fluorescence spectra of A, wild type RelE and B, RelE<sup>R81A/R83A</sup> mutant were recorded as a function of RelB<sub>C</sub> concentration. The fluorescence emission spectra were monitored at 20 °C in a wavelength range of 300-400 nm with a fixed excitation wavelength at 295 nm. The sample solution contains 200 nM wild type RelE or RelE<sup>R81A/R83A</sup> mutant in 20 mM NaPi, 500 mM NaCl, 1 mM DTT and increasing concentration of RelB<sub>C</sub> peptide (0-500 nM). The fluorescence emission maximum intensities were plotted against the concentration of RelB<sub>C</sub> peptide (insert panels). The dissociation constants ( $K_D$ ) were fitted using the Hill equation:  $F_{obs} = F_0 + F_{max} * S^n / (K_D^n + S^n)$ , where  $F_{obs}$  represents the measured intrinsic tryptophan fluorescence,  $F_0$  and  $F_{max}$  represent the minimum and maximum fluorescence values,  $S$  represents the peptide concentration and  $n$  represents cooperativity coefficient.

**Suppl. Fig. S3. Binding induced folding of RelB<sub>C</sub> and unfolding of RelE<sup>R81A/R83A</sup>.** The chemical shift index (CSI) analysis of A, free (blue) and B, RelE<sup>R81A/R83A</sup>-bound (red) RelB<sub>C</sub> reveals a disordered-to-ordered conformational transition upon binding. The CSI analysis of C, free (blue) and D, RelB<sub>C</sub>-bound (red) RelE<sup>R81A/R83A</sup> shows the unfolding of the C-terminal helix  $\alpha 4$  upon RelB<sub>C</sub> binding.

**Suppl. Fig. S4. Chemical shift changes mapped on the structure of RelE<sup>R81A/R83A</sup>:RelB<sub>C</sub>.** Two views of the RelE<sup>R81A/R83A</sup>:RelB<sub>C</sub> complex rotated by 180 degrees. The solvent accessible surface of RelE<sup>R81A/R83A</sup> and the ribbon representation of RelB<sub>C</sub> are colored with a gradient corresponding to the chemical shift changes associated with their interactions.

**Suppl. Fig. S5. Internal motions and dynamics of RelE<sup>R81A/R83A</sup> affected by RelB<sub>C</sub>.** The  $^1\text{H}$ - $^{15}\text{N}$  heteronuclear NOE analysis of A, free (blue) and B, RelB<sub>C</sub>-bound (red) RelE<sup>R81A/R83A</sup>. The transverse relaxation rate ( $R_2$ ) analysis of C, free (blue) and D, RelB<sub>C</sub>-bound (red) RelE<sup>R81A/R83A</sup>. The relaxation data were recorded in a 800 MHz magnetic field.

**Suppl. Fig. S6. Comparison of RelE, aRelE, YoeB and RNase SA structures in complex with their inhibitors.** A, The *E. coli* RelE in complex with RelB<sub>C</sub> (K47-L79). B, The *P. horikoshii* aRelE with aRelB. C, The *E. coli* YoeB with YefM. D, RNase SA with barstar. The secondary structure elements are colored in navy (helices) and green (strands) for the toxins and RNase; and in magenta (helices) and yellow (strands) for the inhibitors. For clarity, only part of structure of barstar, which directly involves the interaction of YefM, is shown in the panel C and D.

**Suppl. Table 1. NMR and refinement statistics for RelE<sup>R81A/R83A</sup> and RelE<sup>R81A/R83A</sup>:RelB<sub>C</sub> structures**

|                                                     | RelE <sup>R81A/R83A</sup> | RelE <sup>R81A/R83A</sup> :RelB <sub>C</sub> |
|-----------------------------------------------------|---------------------------|----------------------------------------------|
| <b>NMR distance and dihedral constraints</b>        |                           |                                              |
| Distance constraints                                |                           |                                              |
| Total NOE                                           | 2,440                     | 3,341                                        |
| Intra-residue                                       | 619                       | 801                                          |
| Inter-residue                                       | 1,821                     | 2,192                                        |
| Sequential ( $ i - j  = 1$ )                        | 550                       | 782                                          |
| Medium-range ( $1 <  i - j  \leq 4$ )               | 481                       | 720                                          |
| Long-range ( $ i - j  \geq 5$ )                     | 790                       | 690                                          |
| Intermolecular                                      | 0                         | 348                                          |
| Hydrogen bonds                                      | 40 x 2                    | 51 x 2                                       |
| Total dihedral angle restraints                     |                           |                                              |
| $\phi$                                              | 62                        | 77                                           |
| $\psi$                                              | 62                        | 77                                           |
| <b>Structure statistics</b>                         |                           |                                              |
| Violations (mean and s.d.)                          |                           |                                              |
| Distance constraints ( $> 0.3 \text{ \AA}$ )        | 0 $\pm$ 0                 | 1 $\pm$ 0                                    |
| Dihedral angle constraints ( $> 5^\circ$ )          | 0 $\pm$ 0                 | 0 $\pm$ 0                                    |
| Max. dihedral angle violation ( $^\circ$ )          | 3.84                      | 2.59                                         |
| Max. distance constraint violation ( $\text{\AA}$ ) | 0.248                     | 0.353                                        |
| Deviations from idealized geometry                  |                           |                                              |
| Bond lengths ( $\text{\AA}$ )                       | 0.0097 $\pm$ 0.0003       | 0.0099 $\pm$ 0.0003                          |
| Bond angles ( $^\circ$ )                            | 1.11 $\pm$ 0.03           | 1.18 $\pm$ 0.02                              |
| Impropers ( $^\circ$ )                              | 1.26 $\pm$ 0.04           | 1.41 $\pm$ 0.07                              |
| Ramachandran Statistics (%)                         |                           |                                              |
| Most favored regions                                | 91.6                      | 85.9                                         |
| Additionally allowed regions                        | 7.8                       | 13.1                                         |
| Generously allowed regions                          | 0.4                       | 0.8                                          |
| Disallowed regions                                  | 0.2                       | 0.2                                          |
| Average pairwise r.m.s. deviation* ( $\text{\AA}$ ) |                           |                                              |
| Heavy (all residues)                                | 1.61 $\pm$ 0.16           | 3.37 $\pm$ 0.71                              |
| Backbone (all residues)                             | 0.95 $\pm$ 0.17           | 2.73 $\pm$ 0.78                              |
| Heavy (Ordered region**)                            | 1.31 $\pm$ 0.15           | 1.26 $\pm$ 0.12                              |
| Backbone (Ordered region)                           | 0.68 $\pm$ 0.16           | 0.54 $\pm$ 0.08                              |

\* Pairwise r.m.s. deviation was calculated among 20 refined structures. \*\* Ordered secondary structure components were defined as: F4-F7 ( $\beta$ 1), E9-R16 ( $\alpha$ 1), S20-V33 ( $\alpha$ 2), E40-N42 ( $\alpha$ 3), C50-K54 ( $\beta$ 2), R61-I67 ( $\beta$ 3) and V71-G79 ( $\beta$ 4) for both free and bound RelE<sup>R81A/R83A</sup>; E85-R93 ( $\alpha$ 4) for free RelE<sup>R81A/R83A</sup>; E54-R65 ( $\alpha$ 3\*) and V72-V74 ( $\beta$ 2\*) for bound RelB<sub>C</sub>.

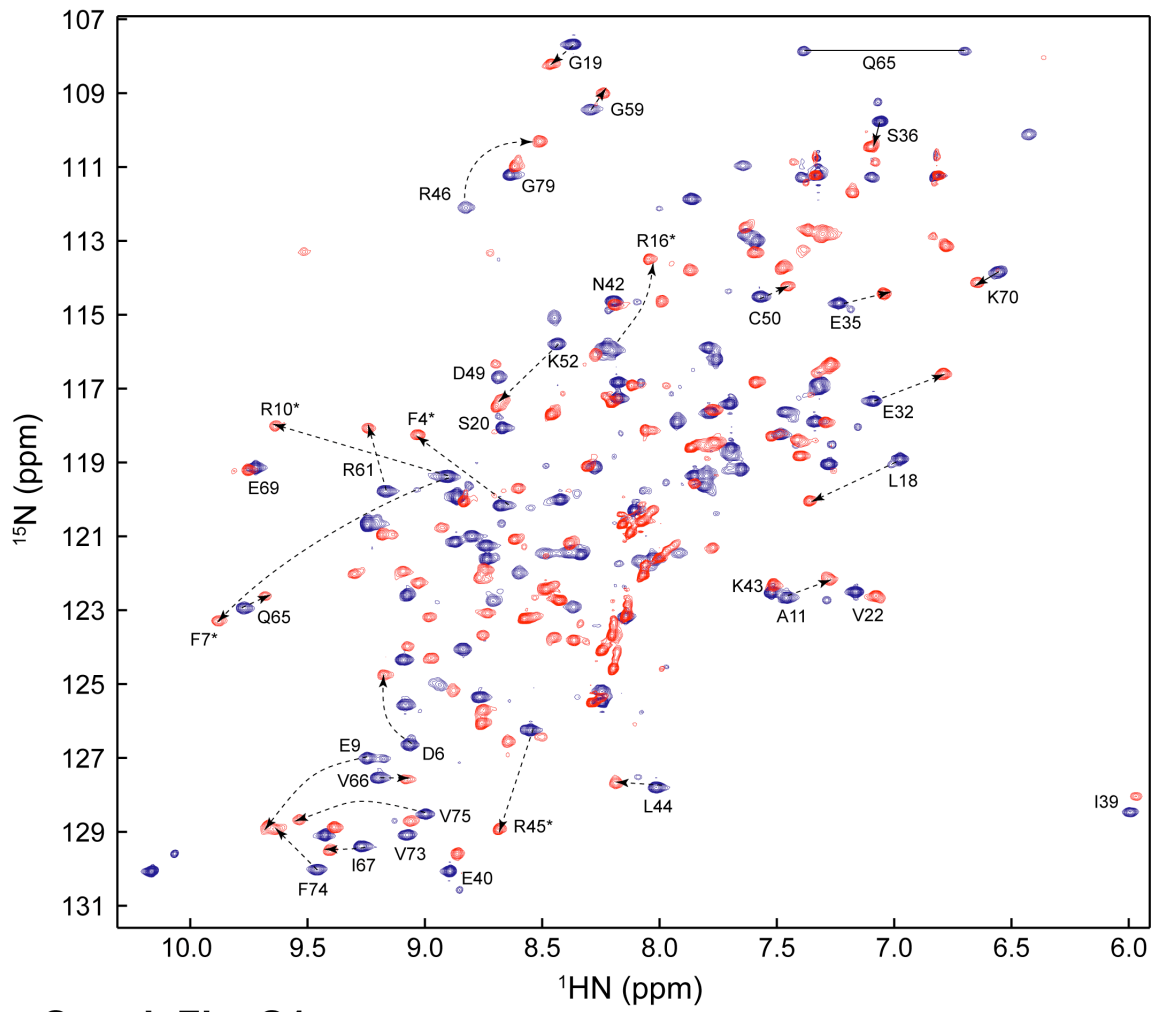

Suppl. Fig. S1

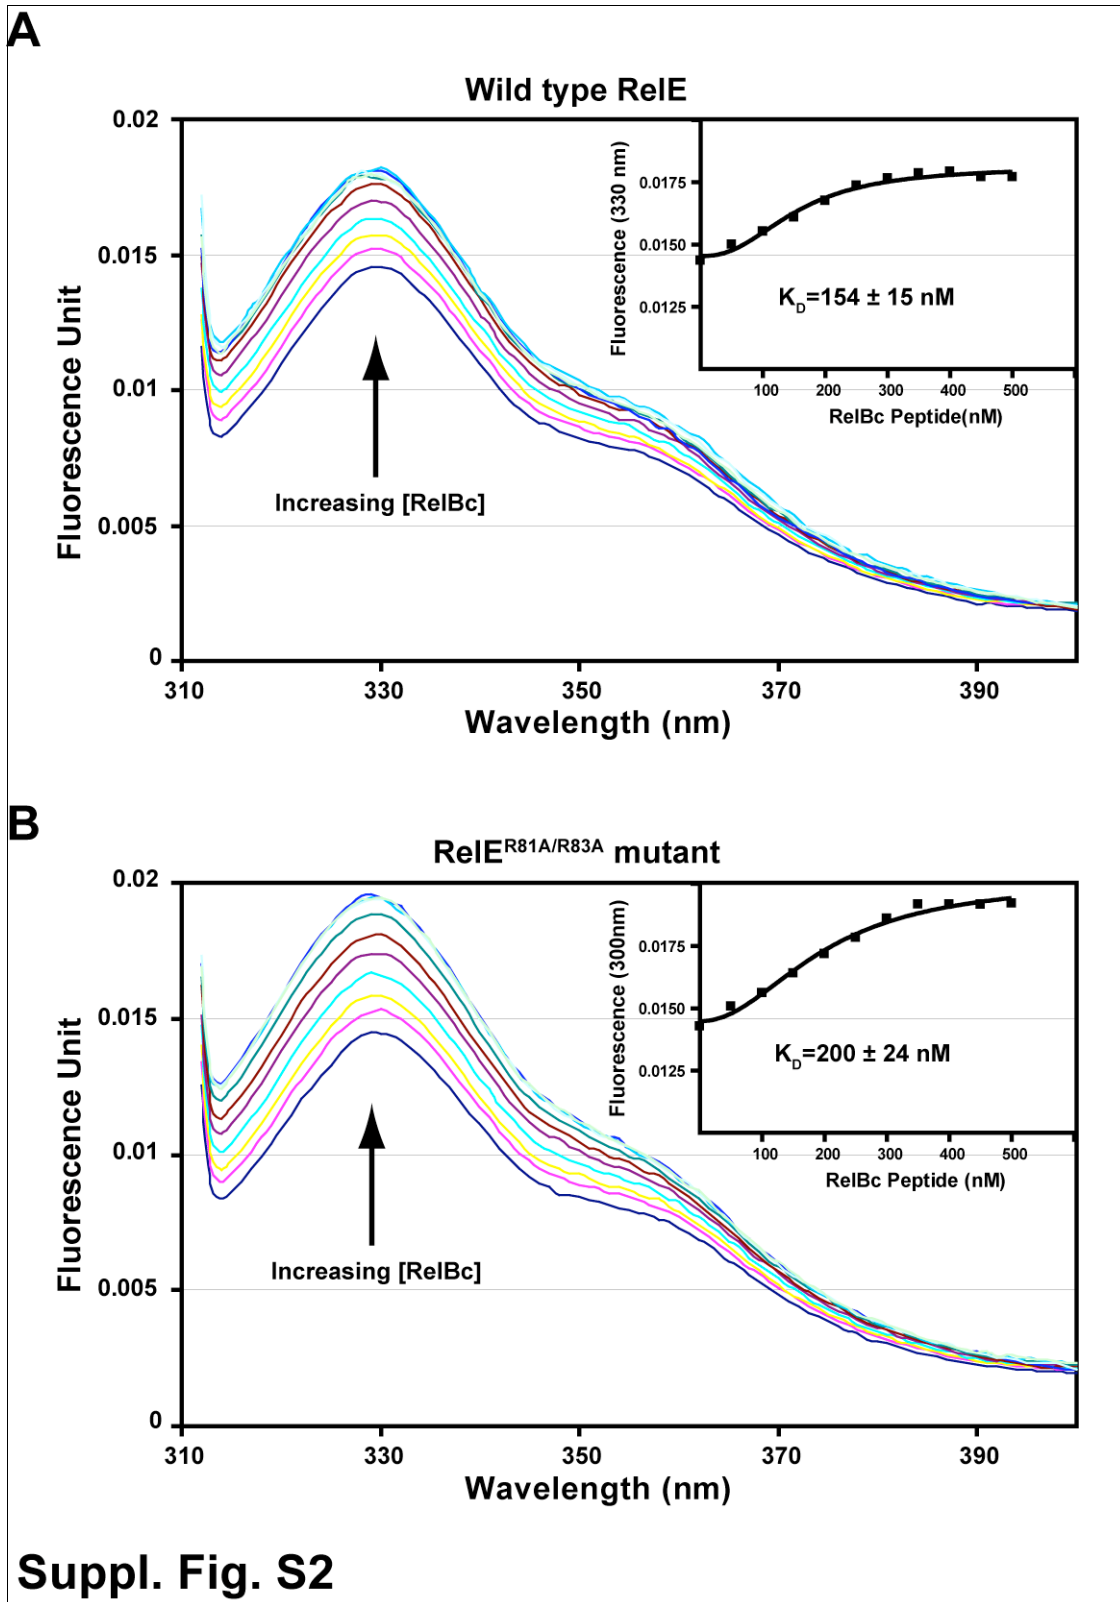

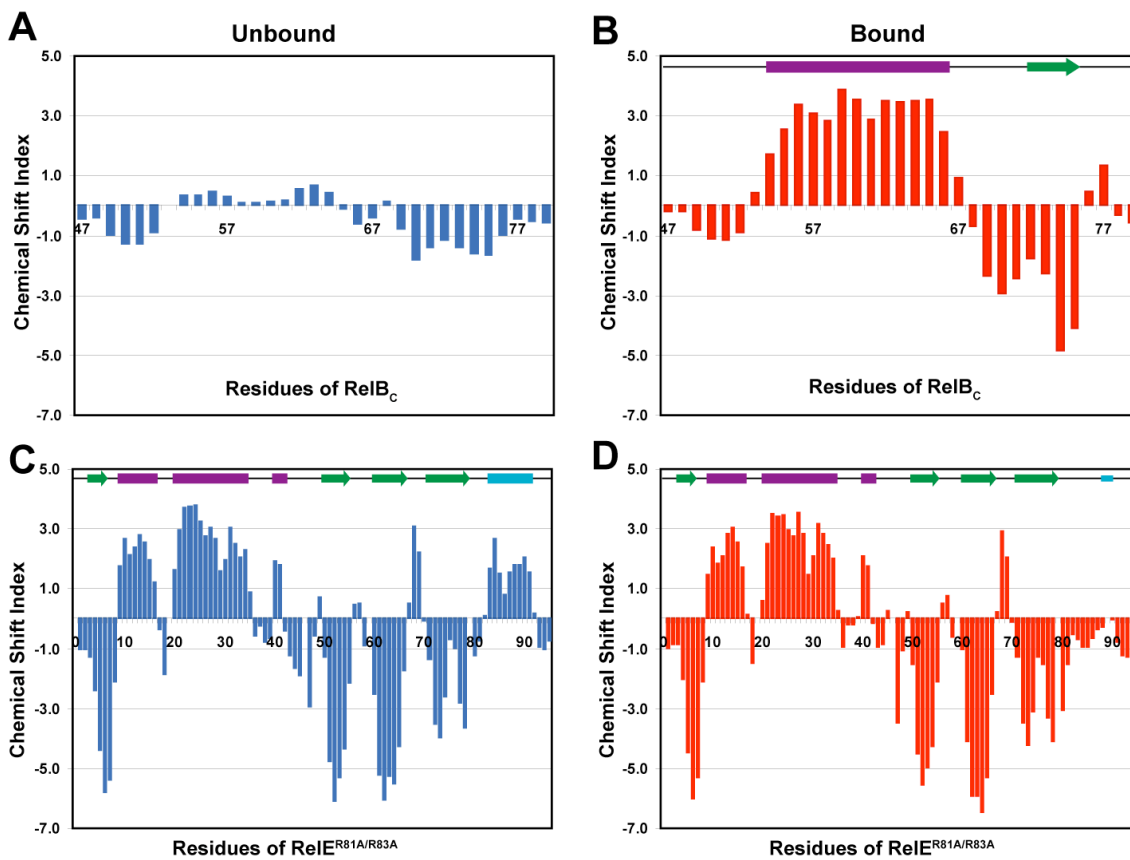

Suppl. Fig. S3

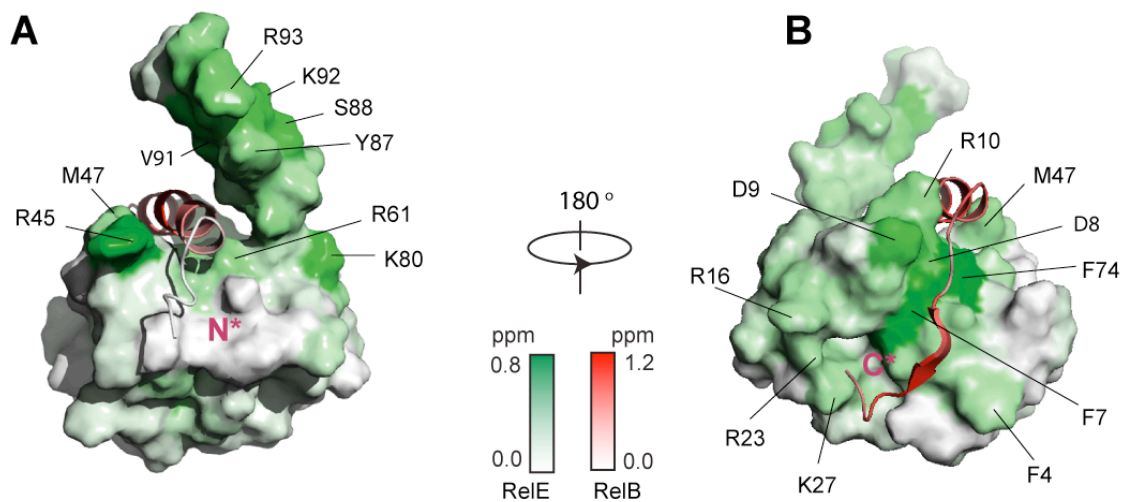

**Suppl. Fig. S4**

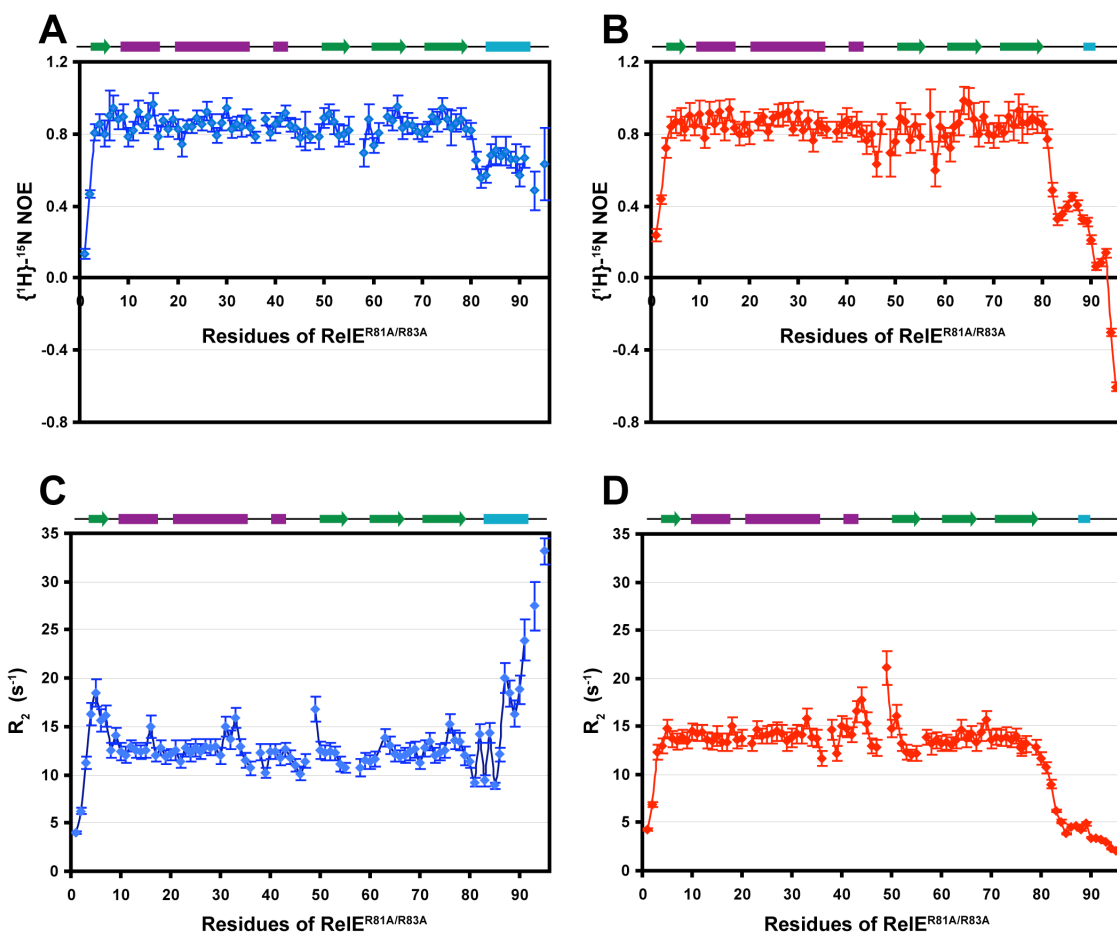

Suppl. Fig. S5

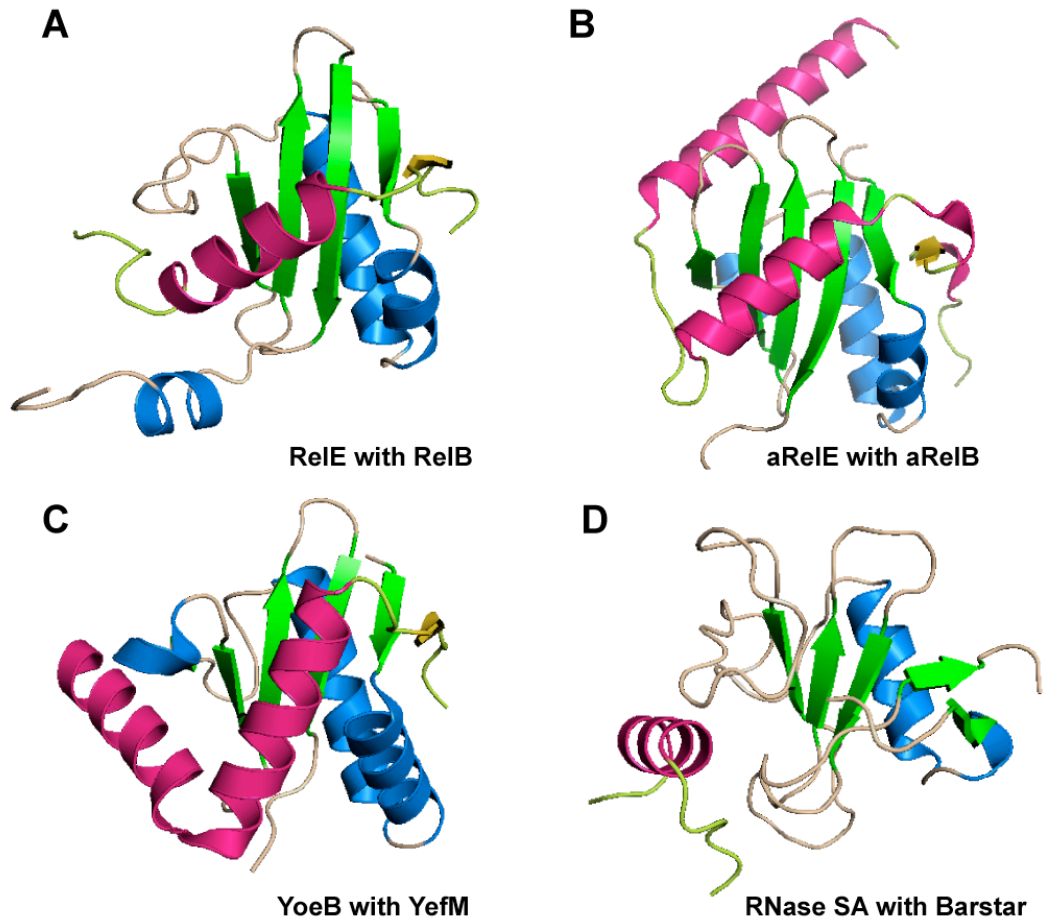

**Suppl. Fig. S6**
